# Supplementary material
Source: PubMed Central journal article supplement (PMC6445697)

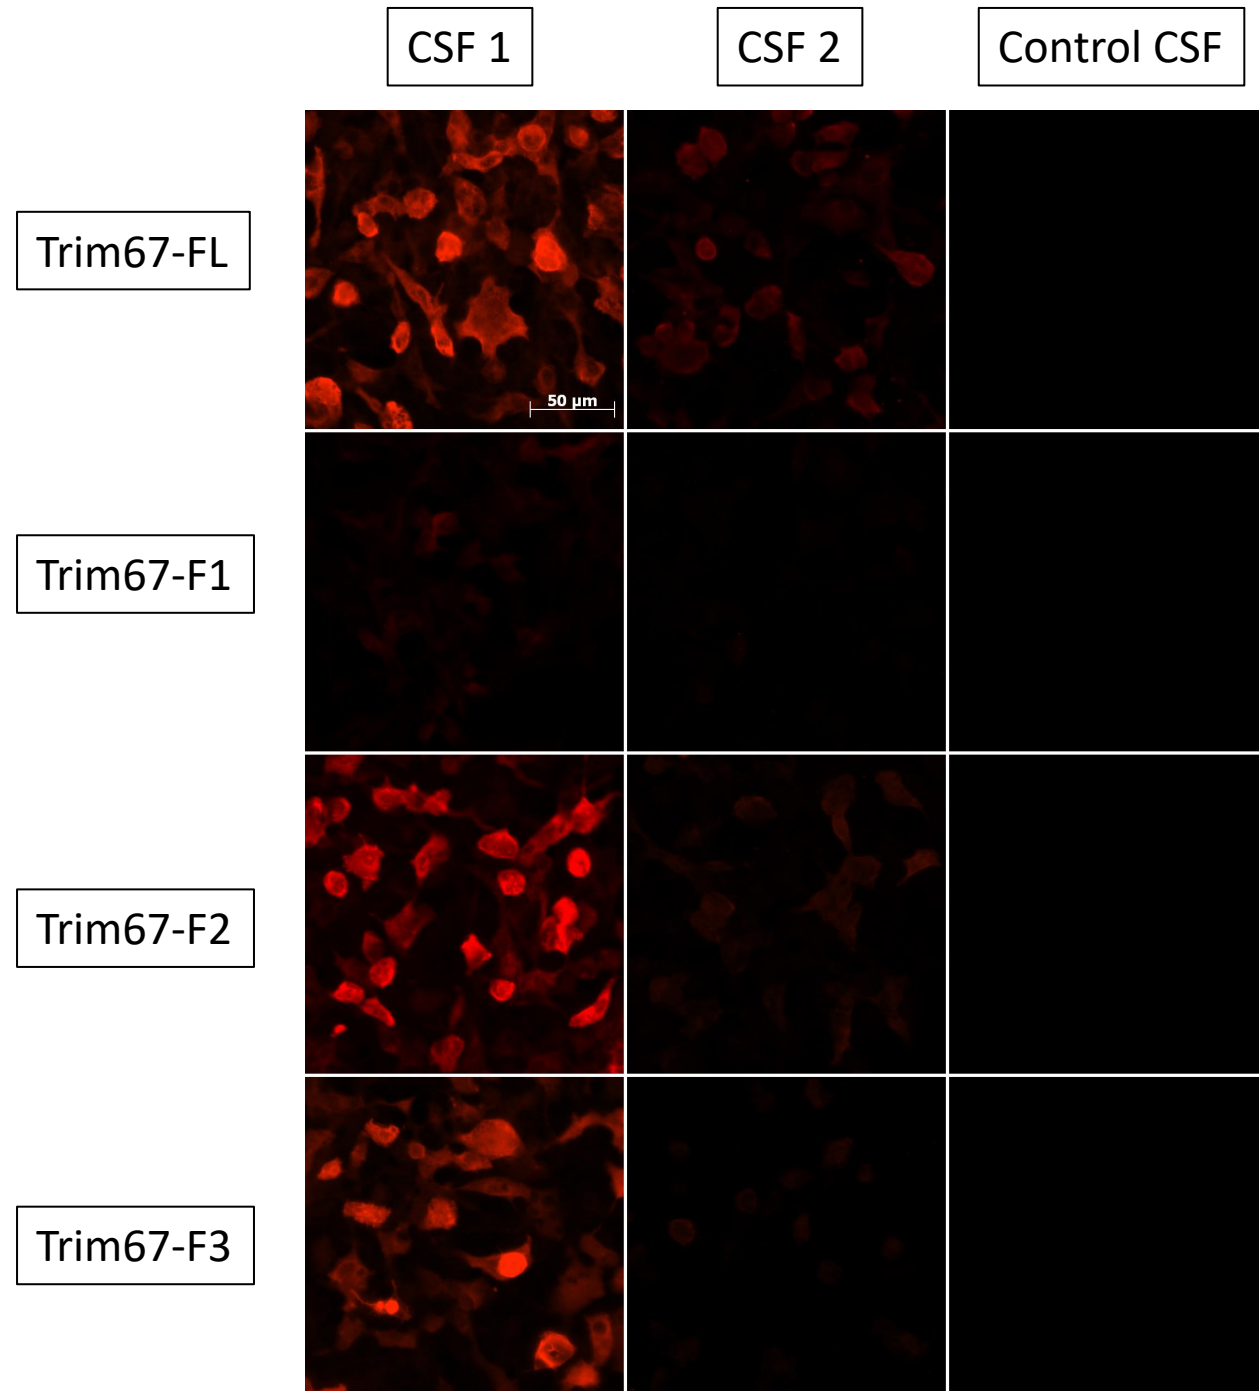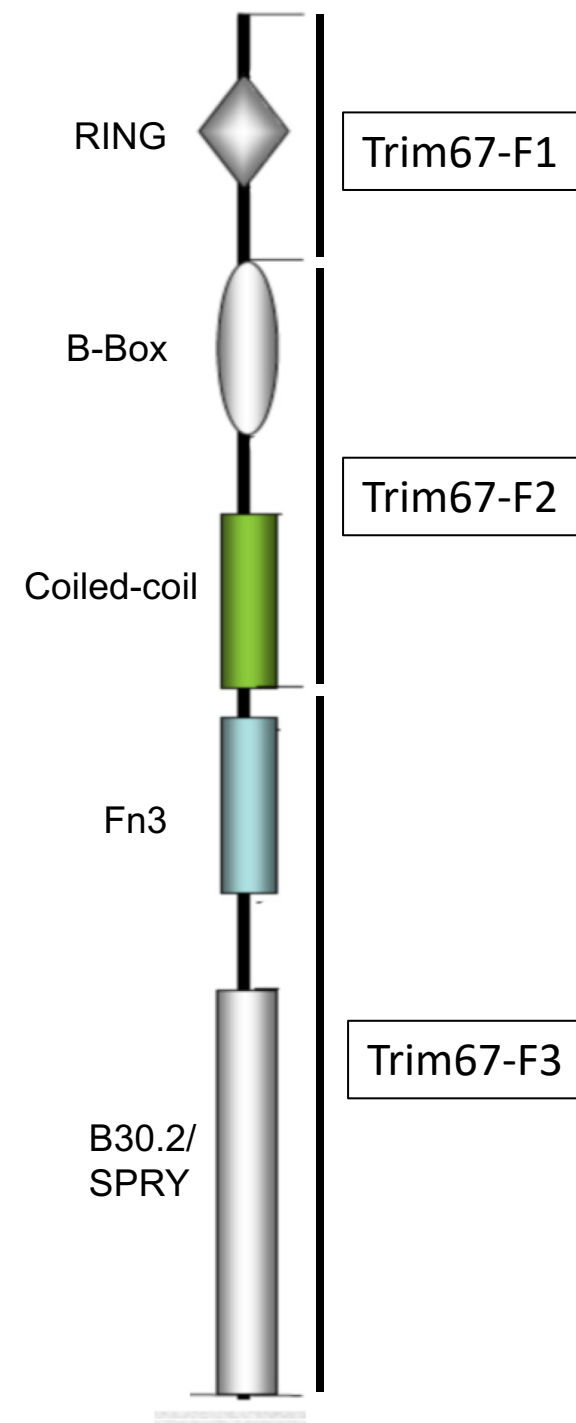

CSF 1

CSF 2

$\alpha$ -myc

$\alpha$ -IgG

Merge

$\alpha$ -myc

$\alpha$ -IgG

Merge

Trim9-FL

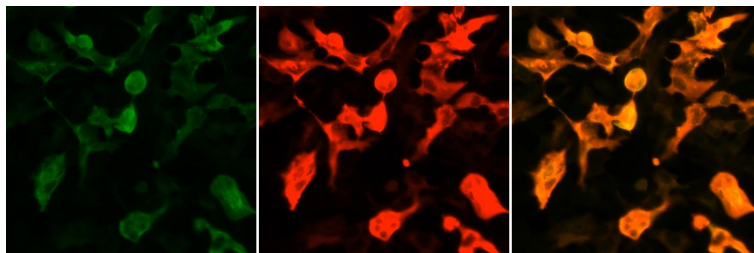

Trim67-FL

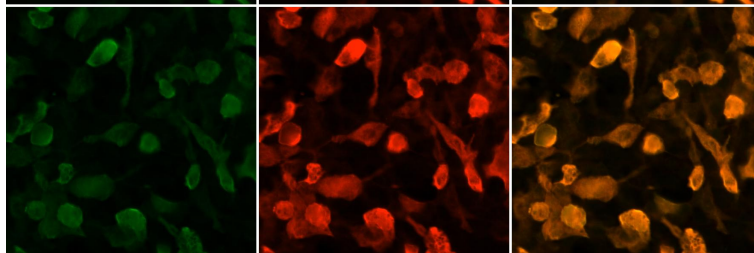

Trim46-FL

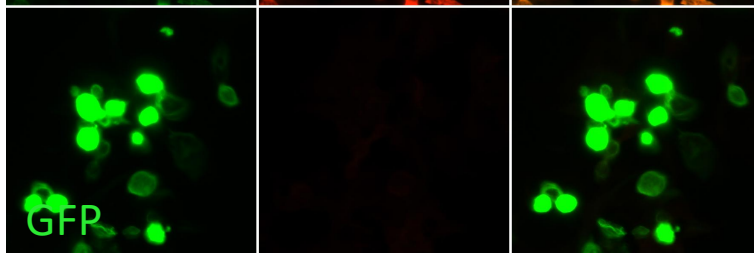

GFP

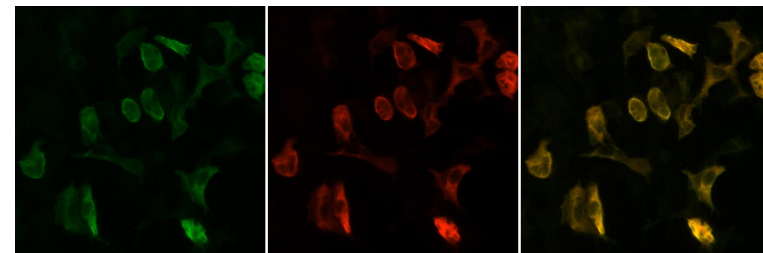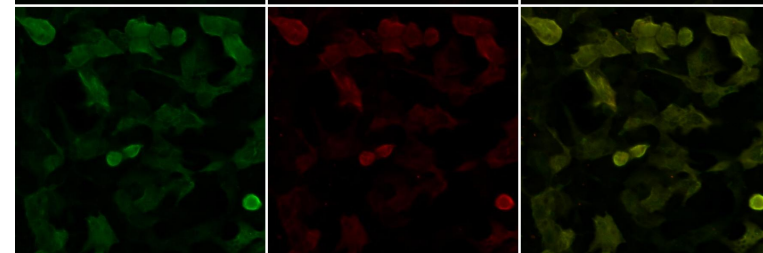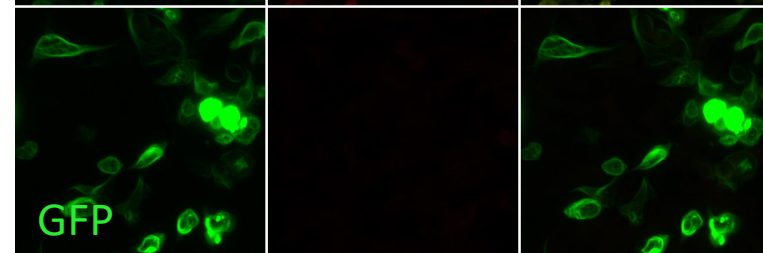

GFP

Supplement: NIHMS995166-supplement-Supp_Figures.pdf [file NIHMS995166-supplement-Supp_Figures.pdf]
